1 **cyAbrB transcriptional regulators as safety devices to inhibit**  
2 **heterocyst differentiation in *Anabaena***

3

4 Running title: cyAbrB transcriptional regulators prevent heterocyst formation

5

6 Akiyoshi Higo<sup>a</sup>, Eri Nishiyama<sup>a</sup>, Kota Nakamura<sup>b</sup>, Yukako Hihara<sup>b</sup>, Shigeki Ehira<sup>a#</sup>

7 <sup>a</sup>Department of Biological Sciences, Graduate School of Science, Tokyo Metropolitan  
8 University, Tokyo, Japan

9 <sup>b</sup>Department of Biochemistry and Molecular Biology, Graduate School of Science and  
10 Engineering, Saitama University, Saitama, Japan

11

12 #Corresponding author: Shigeki Ehira, Department of Biological Sciences, Graduate school of  
13 Science, Tokyo Metropolitan University, Hachioji, Tokyo192-0397, Japan, Telephone:  
14 +81-42-677-2496; E-mail: ehira@tmu.ac.jp

15

16 Word count for the abstract: 229, 139

17 Word count for the text: 4999

18

19 **Abstract**

20 Cyanobacteria are monophyletic organisms that perform oxygenic photosynthesis. While they  
21 exhibit great diversity, they have a common set of genes. However, the essentiality of them for  
22 viability has hampered the elucidation of their functions. One example of the genes is *cyabrB1*  
23 encoding a transcriptional regulator. In the present study, we investigated the function of  
24 *cyabrB1* in heterocyst-forming cyanobacterium *Anabaena* sp. PCC 7120 through CRISPR  
25 interference, a method we recently utilized for the photosynthetic production of a useful  
26 chemical in the strain. Conditional knockdown of *cyabrB1* in the presence of nitrate resulted in  
27 formation of heterocysts. Two genes, *hetP* and *hepA*, which are required for heterocyst  
28 formation, were up-regulated by *cyabrB1* knockdown in the presence of combined nitrogen  
29 sources. The genes are known to be induced by HetR, a master regulator of heterocyst formation.  
30 *hetR* was not induced by *cyabrB1* knockdown. *hetP* and *hepA* were repressed by direct binding  
31 of cyAbrB1 to their promoter regions in a HetR-independent manner. In addition, the  
32 over-expression of *cyabrB1* abolished heterocyst formation upon nitrogen depletion. Also,  
33 knockout of *cyabrB2*, a paralogue gene of *cyabrB1*, in addition to *cyabrB1* knockdown,  
34 enhanced heterocyst formation in the presence of nitrate, suggesting functional redundancy of  
35 cyAbrB proteins. We propose that a balance between amounts of HetR and cyAbrB1 is a key  
36 factor influencing heterocyst differentiation during nitrogen step-down. cyAbrB proteins are  
37 essential safety devices inhibiting heterocyst differentiation.

38

39

40

41

42

43 **Importance**

44 Spore formation in *Bacillus subtilis* and *Streptomyces* represents non-terminal differentiation  
45 and has been extensively studied as models of prokaryotic cell differentiation. In the two  
46 organisms, many cells differentiate simultaneously, and the differentiation is governed by a  
47 network in which one regulator stands at the top. Differentiation of heterocysts in *Anabaena* sp.  
48 PCC 7120 has also been extensively studied. The differentiation is unique because it is terminal  
49 and only 5-10% vegetative cells differentiate into heterocysts. In the present study, we identified  
50 cyAbrB1 as a repressor of two genes that are essential for heterocyst formation, *hetP* and *hepA*,  
51 independent of HetR, which is a master activator for heterocyst differentiation. The finding is  
52 reasonable for unique cell differentiation of *Anabaena* because cyAbrB1 could suppress  
53 heterocyst differentiation tightly in vegetative cells, while only cells in which HetR is  
54 over-expressed could differentiate into heterocysts.

55

56 **Introduction**

57 Cyanobacteria are ancient and monophyletic prokaryotes, which are characterized by a capacity  
58 to perform oxygenic photosynthesis. They are found in diverse habitats, including fresh and  
59 marine water, hot springs, frozen lakes, soil, and deserts (1). Specific responses to  
60 environmental changes enable them to adapt to their habitats (2). In addition, they exhibit a  
61 great diversity of morphology and cell arrangements. Moreover, some cyanobacteria can  
62 differentiate into specific cell types in response to environmental stimuli, which is one type of  
63 stress response. The most studied differentiated cell type in cyanobacteria is the heterocyst. At  
64 semi-regular intervals, some filamentous cyanobacteria can differentiate into larger and round  
65 cells called heterocysts, which are cells specialized for nitrogen fixation, which enables  
66 heterocystous cyanobacteria to inhabit nitrogen-poor environments.

67 *Anabaena* sp. PCC 7120 (*Anabaena*) has been extensively studied as a model for  
68 heterocyst differentiation (3,4). Upon the depletion of combined nitrogen, 5-10% of vegetative  
69 cells that perform oxygenic photosynthesis differentiate into heterocysts. A transcriptional  
70 regulator, NtcA, widely conserved in cyanobacteria, perceives nitrogen deficiency as an  
71 increase of a metabolite 2-oxoglutarate (5). Subsequently, NtcA indirectly induces HetR, a  
72 master regulator of heterocyst differentiation (6). Accumulation of HetR spatially initiates  
73 specific developmental program and enables patterned heterocyst formation (7–9). During  
74 differentiation, deposition of exopolysaccharide and glycolipid layers results in morphological  
75 changes in the cells. In addition, cellular metabolism is dynamically altered by the inactivation  
76 of oxygenic photosystem II and enhancement of respiration (3,4). Such changes enable  
77 heterocysts to protect oxygen-labile nitrogenase from oxygen.

78 Despite their great diversity, cyanobacteria have a core set of genes that are conserved  
79 across the phylum (10, 11). Many of the conserved genes have been found to be associated with

80 core biological process such as DNA replication, transcription, translation, photosynthesis, the  
81 Calvin cycle, and various metabolic pathways (11). Therefore, many of their functions can be  
82 predicted. However, the functions of some of the conserved genes are yet to be elucidated.  
83 Although the study of such genes could offer novel insights into cyanobacterial biology,  
84 essentiality of the core genes (11, 12) has hampered such investigations. An example of the  
85 genes is *cyabr1* (13).

86 *cyabrB* encoding a transcriptional regulator is conserved among cyanobacteria (13). The  
87 DNA-binding domain of cyAbrB located at the C-terminus belongs to AbrB-like family  
88 (Pfam14250), which is unique to cyanobacteria and is not conserved in other organisms  
89 including melainobacteria, a non-photosynthetic sister phylum to the cyanobacteria. Each  
90 cyanobacterium has two copies of *cyabrB* genes, *cyabrB1* and *cyabrB2* (also known as *calA* and  
91 *calB* in *Anabaena*, respectively). Because some attempts to disrupt *cyabrB1* in *Anabaena* and  
92 unicellular cyanobacterium *Synechocystis* sp. PCC 6803 (*Synechocystis*) have failed so far  
93 (13–16), the gene should be essential for cyanobacteria. Conversely, gene disruption of *cyabrB2*  
94 is possible in *Synechocystis*. Studies on *cyabrB2* mutants have revealed that *cyAbrB2* is  
95 involved in acclimation to changes in carbon and nitrogen availability (13, 17–19). While the  
96 studies demonstrated that *cyabrB2* had specific functions, some evidence suggested a functional  
97 overlap between cyAbrB1 and cyAbrB2 (20).

98 Recent studies towards photosynthetic production of useful chemicals have rapidly  
99 developed tools for artificial gene regulation systems for cyanobacteria (21–23). Among them, a  
100 gene knockdown technology, CRISPR interference (CRISPRi), has attracted much attention  
101 because the system exhibited repression over a wide dynamic range in an inducer  
102 concentration-dependent manner (24–28). Target genes can be repressed by the formation of a  
103 complex consisting of a nuclease-deficient Cas9 (dCas9), a single guide RNA (sgRNA), which

104 corresponds to the target DNA sequence, and target DNA (29). While CRISPRi has been  
105 successfully applied to enhance the production of desired products in cyanobacteria (24–26, 30),  
106 its basic scientific applications are still awaited.

107 A question of whether a transcriptional regulator cyAbrB1 conserved in cyanobacteria  
108 regulates core genes or specific genes in *Anabaena* motivated us to study the function of  
109 *cyabrB1*. In the present study, we created *Anabaena* strains in which *cyabrB1* is conditionally  
110 knocked down through CRISPRi technology. cyAbrB1 amounts were significantly repressed in  
111 any conditions tested and in any genetic background tested when the CRISPRi system was  
112 induced. Repression of *cyabrB1* resulted in formation of heterocysts even in the presence of  
113 nitrate. Not *hetR*, but two direct target genes of HetR, *hetP* and *hepA*, which are required for  
114 heterocyst development (4), were induced by *cyabrB1* knockdown in the presence of combined  
115 nitrogen in a HetR-independent manner. Over-expression of *cyabrB1* abolished heterocyst  
116 formation under nitrogen-depleted conditions. Therefore, we concluded that cyAbrB1 is  
117 essential for the suppression of heterocyst differentiation and propose a model that cyAbrB1  
118 offers HetR an appropriate threshold for the induction of heterocyst development.

119

120

## 121 **Results**

### 122 **Heterocyst formation by *cyabrB1* knockdown in the presence of nitrate**

123 A conditional *cyabrB1* knockdown strain C104 was constructed by integrating a plasmid  
124 containing  $P_{petE}$ -*tetR*,  $P_{L03}$ -*dcas9*, and  $P_{J23119}$ -sgRNA targeting *cyabrB1* (Figure S1) to the neutral  
125 site *cyaA* (31). In the strain, an inducer anhydrotetracycline (aTc) derepresses *L03* promoter by  
126 binding to TetR, and *dcas9* is induced. sgRNA is constitutively expressed. Therefore, the  
127 addition of aTc switches on repression by CRISPRi. A negative control strain C100 without

128 sgRNA was also constructed.

129 Strain C104 was grown in nitrate-containing medium and bubbled with air containing  
130 1% (v/v) CO<sub>2</sub>. When the expression of *cyabrB1* was repressed for 48 h, 0.6% of heterocysts  
131 were formed (Fig. S2A). In contrast, when *cyabrB1* was not repressed, little heterocysts  
132 (<0.1%) were formed. To facilitate clearer observation of the phenotype, C104 was cultured in  
133 nitrate-containing medium and bubbled with air containing 5% (v/v) CO<sub>2</sub>, in which carbon is  
134 excess to nitrogen in the cells. In this condition, C104 and C100 formed 0.5 and 0.4% of the  
135 heterocysts, respectively, in the absence of the inducer. In the presence of the inducer, C104  
136 formed 2.9% of the heterocysts but C100 did not form any heterocysts (Fig. 1A) (<0.1%).  
137 Knockdown of cyAbrB1 was confirmed by western-blotting analysis (Fig. 1B and C). While an  
138 addition of aTc to control strain C100 did not repress cyAbrB1 expression, in the case of C104,  
139 addition of aTc considerably repressed cyAbrB1 expression (less than 10%), particularly at 48  
140 and 72 h. Repression of *cyabrB1* did not lead to heterocyst formation when C104 was cultured  
141 in ammonium-containing medium (Fig. S2B).

142 To rule out the possibility that the observed phenotype is due to off-target effects of  
143 CRISPRi, we constructed C105 and C106 that retain sgRNA targeting different sites of *cyabrB1*.  
144 Formation of heterocyst was promoted in both C105 and C106 by *cyabrB1* repression similarly  
145 in C104, when cells were cultured in nitrate-containing medium and bubbled with air containing  
146 5% (v/v) CO<sub>2</sub> (Fig. S3). The results suggest that cyAbrB1 is required for the suppression of  
147 heterocyst formation in the presence of nitrate.

148

#### 149 **Repression of *hetP* and *hepA* by cyAbrB1 in the presence of nitrogen sources**

150 To elucidate the cause of heterocyst formation in the presence of nitrate, RNA was extracted  
151 from cells of C100 and C104 cultured for 48 h in nitrate-containing medium with 5% CO<sub>2</sub> in the

152 absence or presence of the inducer, and an RT-qPCR analysis was performed. The expression of  
153 four genes that are induced at early stages of heterocyst development, including *hetR*, *hetP*, *hetZ*,  
154 and *hepA*, was investigated (Fig. 2A). *hetR* encodes a master regulator of heterocyst  
155 differentiation and its over-expression causes heterocyst formation in the presence of nitrogen  
156 sources (9). Both *hetP* and *hetZ* are directly up-regulated by HetR, and ectopic expression of  
157 either gene leads to heterocyst formation in the presence of nitrogen sources (4, 32–36). *hepA*  
158 encodes a component of an ABC transporter required for the construction of the heterocyst  
159 exopolysaccharide layer (37), which is the first step during morphological differentiation (4).  
160 HetR also directly induces expression of *hepA* (4, 38). While the expression of *hetR* and *hetZ*  
161 did not change significantly, the expression of *hetP* and *hepA* was significantly induced when  
162 *cyabrB1* was repressed in C104. Similar results were observed in C105 and C106 (Fig. 2A). We  
163 confirmed that *cyabrB1* transcript and cyAbrB1 protein in C104, C105, and C106 were  
164 repressed in the presence of the inducer (Fig. S4A and B, respectively).

165 Subsequently, we extracted RNA from C104 cultured in the presence of nitrate with 1%  
166 CO<sub>2</sub> bubbled or in the presence of ammonium with 5% CO<sub>2</sub> bubbled (Fig. 2B). Although no  
167 heterocysts were formed in the latter condition, *hetP* and *hepA* were greatly induced when  
168 *cyabrB1* was repressed in both conditions, similarly in Fig 2A. We confirmed that *cyabrB1*  
169 transcript and cyAbrB1 protein were repressed in both conditions in the presence of the inducer  
170 (Fig. S4C and D, respectively). The results indicate that the up-regulation of *hetP* and *hepA* by  
171 *cyabrB1* knockdown induced heterocyst formation rather than *hetP* and *hepA* were induced  
172 following the initiation of heterocyst development, and that heterocyst formation was  
173 suppressed by an unknown mechanism in the presence of ammonium.

174 Expression of *nifH* encoding a subunit of nitrogenase was quantified to determine  
175 whether the heterocysts formed by *cyabrB1* repression were functional. Repression of *cyabrB1*



176 in C104 in the presence of nitrate bubbled with 5% CO<sub>2</sub> induced *nifH*, but not under bubbling  
177 with 1% CO<sub>2</sub> (Fig. S5), suggesting that maturation of heterocysts depends on C-N balance  
178 inside the cells and does not directly depend on cyAbrB1. Therefore, we concluded that  
179 cyAbrB1 is essential for repression of *hetP* and *hepA* in the presence of nitrogen sources.

180

### 181 **Induction of *hetP* and *hepA* by cyAbrB1 knockdown independently of HetR**

182 To clarify whether the up-regulation of *hetP* and *hepA* is independent of or dependent on HetR,  
183 we constructed a C104h strain in which *cyabrB1* could be knocked down using the CRISPRi  
184 system in a *hetR* mutant strain (39) (Fig. S1). RNA was extracted from C104h cultured in the  
185 presence of nitrate bubbled with 5% CO<sub>2</sub> in the absence or presence of aTc. RT-qPCR analysis  
186 revealed that *hetP* and *hepA* were up-regulated by *cyabrB1* repression in the *hetR*-deficient  
187 background (Fig. 3A), indicating that cyAbrB1 regulates the expression of the two genes  
188 independently of HetR. We confirmed that *cyabrB1* transcript and cyAbrB1 protein in C104h  
189 were repressed similarly in C104 in the presence of the inducer (Fig. 3A and B).

190 Heterocysts were not formed following the repression of *cyabrB1* in C104h (Fig. 3C).  
191 Although the expression of *hetP* in C104h was induced by *cyabrB1* in the presence aTc  
192 compared to in the absence of the inducer, the expression levels of *hetP* in the presence of the  
193 inducer in C104h were low compared to those in C104 (Figs. 2A and 3A), possibly due to the  
194 effect of *hetR* disruption. The result could explain why heterocysts were not formed even when  
195 *hetP* and *hepA* were induced in C104h (Fig. 3C).

196

### 197 **Specificity and redundancy of cyAbrB proteins**

198 Subsequently, we constructed a *cyabrB2* knockout mutant DR2080 and a *cyabrB1*  
199 knockdown/*cyabrB2* knockout mutant C104B2 (Fig. S1) to examine specificity and redundancy

200 of cyAbrB1 and cyAbrB2. In C104B2, *cyabrB1* knockdown caused 4.5% heterocyst formation  
201 in nitrate-containing medium bubbled with 1% CO<sub>2</sub> (Fig. 4A). In contrast, *cyabrB1* knockdown  
202 mutant C104 and *cyabrB2* knockout mutant DR2080 produced only 0.6 and 0% heterocyst  
203 under similar conditions, respectively (Fig. S2A and Fig. 4A). An RT-qPCR analysis revealed  
204 that *hetP* and *hepA* were similarly induced by *cyabrB1* knockdown in C104 and C104B2  
205 (Compare Figs. 2B and 4B). The expression of *hetR* and *hetZ* were not induced by *cyabrB1*  
206 knockdown in C104B2, similarly to in C104 (Fig. 4B). Deletion of *cyabrB2* hardly influenced  
207 expression of *hetR*, *hetP*, *hetZ*, and *hepA*. Repression of *cyabrB1* transcript and cyAbrB1  
208 protein in C104B2 was confirmed (Fig. S6A and B). C104B2 did not form heterocysts in  
209 ammonium-containing medium (Fig. S6C). Comparison of the results with *cyabrB1* knockdown,  
210 *cyabrB2* knockout, and *cyabrB1* knockdown/*cyabrB2* knockout mutants revealed that cyAbrB1  
211 but not cyAbrB2, specifically regulates the expression of *hetP* and *hepA*. However, with regard  
212 to heterocyst formation in the presence of nitrate, cyAbrB1 and cyAbrB2 could be redundant  
213 since the double mutant produced more heterocysts compared to single mutants.

214

#### 215 **Direct binding of cyAbrB1 to promoters of *hetP* and *hepA***

216 To test whether the expression of *hetP* and *hepA* was directly regulated by cyAbrB1, we  
217 expressed a recombinant His-cyAbrB1 in *Escherichia coli* and purified it. The purified  
218 His-cyAbrB1 protein had an apparent molecular weight of 18,000, which was largely consistent  
219 with the theoretical value (Fig. 5A). We performed a gel mobility shift assay using His-cyAbrB1  
220 and Cy3-labeled DNA probe PhetP that includes *hetP* promoter region (Fig. 5B). His-cyAbrB1  
221 retarded the mobility of the probe. Thereafter, we examined the specificity of the interaction  
222 using a competition assay. Addition of a 5 or 10-fold molar excess of non-labeled DNA probe  
223 PhetP and PhepA (*hepA* promoter region) eliminated the retardation, but that of cyabrB1RT

224 (internal region of *cyabrB1*) did not (Fig. 5B). The results indicate that cyAbrB1 binds promoter  
225 regions of *hetP* and *hepA* and that the two genes are directly repressed by cyAbrB1.

226

### 227 **Inhibition of heterocyst formation by over-expression of *cyabrB1***

228 We investigated whether or how cyAbrB1 participates in heterocyst development in the absence  
229 of nitrogen sources. *cyabrB1* was knocked down upon removal of combined nitrogen sources in  
230 C104. After 24 or 48 h of nitrogen step-down, heterocysts were formed in the strain in the  
231 absence or presence of aTc (Fig. S7A and B). However, vegetative cell intervals were shorter in  
232 the presence of the inducer than in the absence of the inducer (Fig. S7C). Figure S7D shows that  
233 cyAbrB1 was repressed in the presence of the inducer in C104 at 48 h in the absence of nitrogen  
234 sources.

235 Then, we constructed a *cyabrB1* over-expression strain T121 (Fig. S1). In the strain, aTc  
236 induced the expression of *cyabrB1* driven by  $P_{L03}$ . Strain C100, in which aTc induced the  
237 expression of *dcas9* but not *cyabrB1*, was used as the control strain. C100 or T121 was  
238 transferred from a nitrate-containing medium to a nitrogen-free medium, and was grown in the  
239 absence or presence of aTc. While C100 grew regardless of the absence or presence of aTc,  
240 T121 did not grow at all in the presence of the inducer (Fig. 6A). In contrast, the  
241 over-expression of *cyabrB1* only minimally inhibited the growth of T121 in the presence of  
242 nitrate, as previously demonstrated (40). Microscopic observations revealed that the addition of  
243 aTc to T121 abolished heterocyst formation 24 h after nitrogen depletion (Fig. 6B). Expression  
244 levels of *hetR*, *hetP*, and *hepA* were measured after depletion of nitrogen sources for 8 h, at  
245 which the genes were up-regulated in the wild type strain (41). While the expression of *hetP*  
246 was not repressed, the expression of *hepA* was repressed in T121 in the presence of aTc  
247 compared to in the absence of aTc, or in C100 in the absence or presence of aTc (Fig. 6B).

248 Expression of *hetR* was also repressed in T121 following the addition of aTc, although it was  
249 minimal compared to the expression of *hepA* for an unknown reason. We confirmed that the  
250 addition of aTc led to the accumulation of *cyabrB1* transcripts and cyAbrB1 protein (Fig. 6B).  
251 The results suggested that over-production of cyAbrB1 inhibited the transcription of *hepA*. The  
252 reason why the expression of *hetP* was not inhibited is discussed below.

253 We quantified the amounts of cyAbrB1 after nitrogen depletion in PCC 7120. Cells of  
254 PCC 7120 were washed by nitrogen-free medium and transferred to nitrate-containing or  
255 nitrogen-free medium, and were cultured for 8 h. Total proteins were extracted from cells before  
256 and after their cultivation. Western blotting using anti-cyAbrB1 antibody revealed that the  
257 depletion of nitrogen sources did not alter the amounts of cyAbrB1 (Fig. S8A and B). We also  
258 quantified the amounts of cyAbrB1 in mature heterocysts after nitrogen depletion for 24 h  
259 relative to that in whole filaments. The amounts of cyAbrB1 were marginally lower in  
260 heterocysts (Fig. S8C and D). The results suggested that high induction of HetR in  
261 proheterocysts (42) rather than decreasing cyAbrB1 amounts was a limiting step in the  
262 up-regulation of *hetP* and *hepA* during heterocyst development in the wild type strain following  
263 combined nitrogen step-down.

264

#### 265 **Effect of *cyabrB1* repression or over-expression on the expression of *alr0947***

266 It has previously been shown that *cyabrB1* and *alr0947* constitute an operon (40). Therefore, we  
267 evaluated the polar effect of *cyabrB1* repression. While the expression of *cyabrB1* was highly  
268 repressed following the addition of aTc in C104, C105, and C106 in some conditions (Fig. S4A  
269 and C), the expression of *alr0947* was only slightly repressed (Fig. S9A and B). It was  
270 demonstrated that the over-expression of cyAbrB1 repressed the expression of *alr0947* since  
271 cyAbrB1 inhibits the transcription of the *cyabrB1-alr0947* operon (40). When *cyabrB1* was

272 over-expressed, *alr0497* was repressed marginally (Fig. S9). While both repression and  
273 induction of *cyabrB1* resulted in a slight decrease in *alr0947* expression, repression induced  
274 heterocyst formation and the induction inhibited heterocyst formation, indicating that the  
275 observed phenotypes in the present study were caused by changes in expression levels of  
276 *cyabrB1* rather than those of *alr0947*.

277

## 278 **Discussion**

279 In the present study, we revealed that cyAbrB1 is essential for the repression of *hetP* and *hepA*  
280 in the presence of nitrogen sources and that heterocysts are formed even in the presence of  
281 nitrate when *cyabrB1* is knocked out. Since the first description of *cyabrB1* in cyanobacteria  
282 (13), its essentiality has hampered investigation of the function of the gene. We overcome the  
283 challenge by applying CRISPRi, which is recently developed technology that has been  
284 employed to facilitate photosynthetic production of desired chemicals in some model  
285 cyanobacteria (24–26). Here, we demonstrated that the technology is also very useful for basic  
286 research. In all the conditions tested, and in any genetic backgrounds, CRISPRi facilitated the  
287 robust knock down of *cyabrB1*. The inhibition of heterocyst formation by the over-expression of  
288 *cyabrB1* in the absence of nitrogen sources has been overlooked so far. Agervald et al. (40) used  
289 the *nirA* promoter, which over-expresses only in the presence of nitrate while He and Xu (16)  
290 used the *petE* promoter, which might not be strong enough to hinder heterocyst formation.  
291 Consequently, the development of a variety of tools to regulate gene expression (23) is  
292 fundamental and could broaden the range of basic research and biotechnological application.

293

## 294 **Balance between cyAbrB1 and HetR determines heterocyst differentiation**

295 Some evidence indicated that cyAbrB1 hinders heterocyst formation in the presence of nitrogen

296 sources by repressing the expression of *hetP* and *hepA* through specific binding to promoter  
297 regions of the genes, which are direct targets of HetR. The possibility that the up-regulation of  
298 the genes by *cyabrB1* knockdown is due to an increase in HetR proteins or its activity (e.g.  
299 decreased level of PatS, a HetR inhibitor (43)) should be rejected based on the results that  
300 *cyAbrB1* regulation of the genes is independent of HetR (Fig. 3A) and that expression of *hetZ*, a  
301 direct target of HetR (34), was not induced following *cyabrB1* knockdown (Fig 2). Upon  
302 nitrogen step-down, amounts of *cyAbrB1* did not significantly decrease (Fig. S8). We propose  
303 that strong induction of HetR in proheterocysts (42) out-competes the repression of *hetP* and  
304 *hepA* by *cyAbrB1* during heterocyst differentiation in a wild type strain. The view is partly  
305 supported by Figure 6, in which the over-expression of *cyAbrB1* hampered the induction of  
306 *hepA* but not the induction of *hetP*. The observation could be explained by the fact that the  
307 binding affinity of HetR for the *hetP* promoter is much higher than that for the *hepA* promoter  
308 (38). Decrease of amounts of *cyAbrB1* or *cyAbrB1* activity attributed to glutathionylation (44)  
309 in proheterocysts is a potential reason. Taken together, we propose that a balance between the  
310 amounts of *cyAbrB1* and HetR is a key determinant for the initiation of heterocyst  
311 differentiation.

312 It is typical that both a global activator and a repressor regulate prokaryotic cell  
313 differentiation. In *Streptomyces*, a global transcriptional activator AdpA and repressor BldD  
314 control morphological differentiation (45, 46), while in *Bacillus subtilis*, an activator Spo0A and  
315 a repressor AbrB regulate spore formation (47). Notably, both the DNA-binding domain of  
316 *cyAbrB* (AbrB-like family, Pfam14250) and that of AbrB from *B. subtilis* (MazE\_antitoxin  
317 family, Pfam04014) belong to the same clan (AbrB, CL0132), although the former is located at  
318 the C-terminus and the latter is located at the N-terminus. However, the relationship between the  
319 activator and the repressor is different between *Anabaena* and *B. subtilis*, as well as

320 *Streptomyces*. The expression of AdpA is regulated by BldD in *Streptomyces* (46, 48) and the  
321 expression of AbrB is regulated by Spo0A in *B. subtilis* (47). In contrast, our results  
322 demonstrated that HetR does not regulate cyAbrB1, and vice versa. Many cells differentiate in *B.*  
323 *subtilis* and *Streptomyces* simultaneously. Hence, the fact that one regulator governs the whole  
324 network is a practical strategy for cell differentiation in the above organisms. In contrast, only  
325 one-tenth of cells differentiate into heterocysts and the remaining vegetative cells maintain  
326 viability and photosynthetic activity in *Anabaena*. In addition, heterocyst differentiation is  
327 terminal (non-reversible) while cell differentiation in *B. subtilis* and *Streptomyces* is  
328 non-terminal (reversible). Therefore, robust inhibition of heterocyst differentiation by cyAbrB1,  
329 whose functioning is independent of HetR, could be an essential safety device in *Anabaena*, in  
330 concert with HetR inhibitors PatS (43) and HetN (49, 50) and regulation by HetR  
331 phosphorylation (51).

332

### 333 **Repression of heterocyst formation in ammonium medium**

334 Heterocysts were formed in the presence of nitrate but not in the presence of ammonium in  
335 *cyabrB1* knockdown mutant C104 even though the expression of *hetP* was induced in the  
336 presence of ammonium similar to in the presence of nitrate when *cyabrB1* was knocked down.  
337 The results suggest the existence of an unidentified mechanism that regulates heterocyst  
338 differentiation. A previous study demonstrated that the over-expression of *hetP* induced  
339 heterocyst formation even in the presence of ammonium (33). The inconsistency between our  
340 results and those of the previous study could be explained by the unidentified mechanism,  
341 which would be cyAbrB1 dependent.

342

### 343 **Perspectives**

344 In the present study, we could not identify target genes of cyAbrB1 other than *hetP* and *hepA*,  
345 which are not conserved in many non-heterocystous cyanobacteria. Up-regulation of the genes  
346 in a cyAbrB1 knockdown mutant could not explain why *cyabrB1* is essential in *Anabaena*. A  
347 transcriptome analysis would identify other target genes comprehensively, and would answer  
348 our question on whether cyAbrB1 conserved in cyanobacteria regulates core genes (10, 11). If  
349 cyAbrB1 regulated core genes, whether cyAbrB1 is involved in the reconstruction of  
350 metabolism during heterocyst development such as inactivation of photosystem II (52) or  
351 enhancement of photosystem I (53) would be an interesting question.

352 Our results demonstrated that cyAbrB1, but not cyAbrB2, specifically regulates the  
353 expression of *hetP* and *hepA*. However, heterocyst formation in the presence of nitrate was  
354 enhanced in double mutant C104B2 than in the single mutant C104 (Fig. 4). The results indicate  
355 that cyAbrB proteins can function both specifically and redundantly/cooperatively in *Anabaena*,  
356 as has been suggested in *Synechocystis* (20), although the underlying mechanism remains to be  
357 elucidated. A transcriptome analysis of C104B2, C104, and that of a *cyabrB1* knockdown  
358 mutant in *Synechocystis* could shed more light on the evolution and adaptation of cyanobacteria.  
359

## 360 **Materials and Methods**

### 361 **Bacterial strains and growth condition**

362 *Anabaena* strains were cultured at 30°C under 30-35  $\mu\text{mol photons m}^{-2} \text{s}^{-1}$  in BG11 medium  
363 (54) (17.6 mM sodium nitrate as nitrogen source). BG11<sub>0</sub> (lacking nitrogen sources) or BG11<sub>a</sub>  
364 (5 mM ammonium chloride as nitrogen sources) were used after washing the cells twice with  
365 BG11<sub>0</sub>, where indicated. Each medium was supplemented with 20 mM HEPES-NaOH (pH 7.5).  
366 Two  $\mu\text{g/ml}$  each of spectinomycin and streptomycin and 25  $\mu\text{g/ml}$  neomycin-sulfate were added  
367 when required. Liquid cultures were bubbled with air containing 1.0% (v/v) CO<sub>2</sub> unless



368 otherwise stated.

369

### 370 **Plasmid construction**

371 Plasmids for the knockdown of *cyabrB1* by CRISPRi or the over-expression of *cyabrB1* were  
372 constructed using the hot fusion method (55). DNA fragments were inserted between the  
373 BamHI and KpnI sites of a genome-integrating vector pSU102-cyaA (26). Schematic  
374 representations of them are shown in Fig. S1 and detailed sequences are described in  
375 Supplemental information. Inactivation of *cyabrB2* was accomplished by replacing a 200-bp  
376 portion of the *cyabrB2* coding region with a spectinomycin resistant cassette as follows.  
377 Upstream and downstream regions of the *cyabrB2* gene were amplified by PCR using the  
378 primer pair 2080-5F and 2080-5R and the 2080-3F and 2080-3R pair, respectively. The  
379 spectinomycin cassette was inserted between upstream and downstream regions and the  
380 resultant construct was cloned between SacI and XhoI sites of pRL271 (56) to construct  
381 pR2080S. To construct the expression plasmids for the hexahistidine-tagged cyAbrB1 protein,  
382 DNA fragment containing the *cyabrB1* coding regions was amplified by PCR using the primer  
383 pair 0946-F and 0946-R. The amplified DNA fragment was cloned between NdeI and BamHI  
384 sites of the pET-28a expression vector (EMD Millipore) to construct pEcyAbrB1.

385

### 386 **RNA extraction and RT-qPCR analysis**

387 Total RNA was extracted from cells using a phenol-based solution PGTX (57) and  
388 Zirconia/Silica beads (□ 0.1 mm). After treatment with DNase I (Takara Bio, Shiga, Japan),  
389 RNA was cleaned-up with NucleoSpin RNA kit (Takara Bio, Shiga, Japan). Synthesis of cDNA  
390 and qPCR were performed as described previously (26). Primers used in qPCR are listed in  
391 Table 1.

392

### 393 **Western-blotting analysis**

394 Cell pellets were resuspended with 400  $\mu$ l of extraction buffer [25 mM HEPES-NaOH (pH 7.5),  
395 1 mM EDTA, 5 mM 2-mercaptoethanol and 1  $\times$  protease inhibitor cocktail (Roche)]. Cells were  
396 disrupted using Bullet Blender (Next Advance) in the presence of 0.5 g of stainless steel beads  
397 ( $\square$  0.2 mm) with 3 cycles of agitation for 3 min and cooling for 3 min. Beads and cell debris  
398 were removed by centrifugation at 21,000  $\times$  g for 3 min. Western-blotting analysis was  
399 conducted as follows: Equal amounts of total protein were separated on a denaturing  
400 SDS-polyacrylamide gel and blotted onto a polyvinylidene fluoride (PVDF) membrane.  
401 cyAbrB1 was detected using a rabbit polyclonal antibody raised against His-cyAbrB1 from  
402 *Synechocystis* (20).

403

### 404 **Enrichment of heterocysts**

405 The enrichment of heterocysts from *Anabaena* filaments was performed as described previously  
406 (26).

407

### 408 **Expression and purification of His-cyAbrB1**

409 *E. coli* BL21(DE3) harboring pEcyabrB1 was grown at 37°C in 250 ml of Luria-Bertani  
410 medium. The recombinant gene was expressed in exponentially growing cells (an OD<sub>600</sub> of 0.6)  
411 by adding 1 mM isopropyl- $\beta$ -D-thiogalactopyranoside. After 5 h of incubation, the cells were  
412 harvested by centrifugation. His-cyAbrB1 was purified with the Ni-NTA Fast Start kit (Qiagen).  
413 The elution fractions containing the purified protein were loaded onto a PD MidiTrap G-25  
414 column (GE healthcare) equilibrated with 20 mM phosphate buffer (pH 7.4) containing 0.5 M  
415 NaCl and 10% glycerol, and the protein was eluted with the same buffer.

416

417 **Gel mobility shift assay**

418 The *hetP* promoter region was amplified by PCR using primer pair PhetP-F and PhetP-R and  
419 was cloned into the EcoRV site of the PBluescript II KS+ to construct pBPhetP. A Cy3-labeled  
420 probe PhetP was prepared by PCR using a Cy3-labeled M13-F primer and PhetP-R with  
421 pBPhetP as a template. His-cyAbrB1 was incubated with a Cy3-labeled probe (3 nM) in 20  $\mu$ l  
422 of incubation buffer [20 mM Tris-HCl (pH 7.5), 10 mM MgCl<sub>2</sub>, 1 mM dithiothreitol, 40 ng/ $\mu$ l  
423 BSA, and 5% glycerol] for 30 min at room temperature. The mixtures were subjected to  
424 electrophoresis on a native 5% polyacrylamide gel and Cy3-labeled probes were detected on an  
425 FLA-9000 imaging system (FUJI Film). Non-labeled DNA probes PhetP, PhepA, and  
426 cyabrB1RT were prepared by PCR using primer pair PhetP-F and PhetP-R, primer pair PhepA-F  
427 and PhepA-R, and primer pair RTcyabrB1-F and RTcyabrB1-R, respectively.

428

429 **Acknowledgments**

430 This work was supported by the Institute for Fermentation, Osaka and by a Grant-in-aid for  
431 Scientific Research (C) 18K05395 from the Japan Society for the Promotion of Science.

432

433 **References**

- 434 1. Whitton, D. A. 2012 *Ecology of cyanobacteria II: their diversity in space and time* Springer.
- 435
- 436 2. Murata, N., and Suzuki, I. 2006 Exploitation of genomic sequences in a systematic analysis to
- 437 access how cyanobacteria sense environmental stress. *J Exp Bot* 57:235–247.
- 438
- 439 3. Kumar, K., Mella-Herrera, R. A., and Golden, J.W. 2010 Cyanobacterial heterocysts. *Cold*
- 440 *Spring Harb. Perspect. Biol.* 2:a000315.
- 441
- 442 4. Flores, E., Picossi, S., Valladares, A., and Herrero, A. 2018 Transcriptional regulation of
- 443 development in heterocyst-forming cyanobacteria. *Biochim Biophys Acta*
- 444 doi:10.1016/j.bbagr.2018.04.006..
- 445
- 446 5. Valladares, A., Flores, E., and Herrero, A. 2008 Transcription activation by NtcA and
- 447 2-oxoglutarate of three genes involved in heterocyst differentiation in the cyanobacterium
- 448 *Anabaena* sp. strain PCC 7120. *J. Bacteriol.* 190:6126–6133.
- 449
- 450 6. Ehira, S., and Ohmori, M. 2006 NrrA directly regulates expression of *hetR* during heterocyst
- 451 differentiation in the cyanobacterium *Anabaena* sp. strain PCC 7120. *J. Bacteriol.*
- 452 188:8520–8525.
- 453
- 454 7. Black, T. A., Cai, Y., and Wolk, C. P. 1993 Spatial expression and autoregulation of *hetR*, a
- 455 gene involved in the control of heterocyst development in *Anabaena*. *Mol. Microbiol.* 9:77–84.
- 456

- 457 8. Zhou, R., Cao, Z., and Zhao, J. 1998 Characterization of HetR protein turnover in *Anabaena*  
458 sp. PCC 7120. Arch Microbiol 169:417–423.  
459
- 460 9. Buikema, W. J., and Haselkorn, R. 2001 Expression of the *Anabaena hetR* gene from a  
461 copper-regulated promoter leads to heterocyst differentiation under repressing conditions. Proc.  
462 Natl. Acad. Sci. USA 98:2729–2734.  
463
- 464 10. Simm, S., Keller, M., Selymes, M., and Schleiff, E. 2015 The composition of the global and  
465 feature specific cyanobacterial core-genomes. Front Microbiol  
466 6:doi:10.3389/fmicb.2015.00219.  
467
- 468 11. Tiruveedula, G. S. S., and Wangikar, P. P. 2017 Gene essentiality, conservation index and  
469 co-evolution of genes in cyanobacteria. PLoS ONE 12:e0178565.  
470
- 471 12. Rubin, B. E., Wetmore, K. M., Price, M. N., Diamond, S., Shultzaberger, R. K., Lowe, L. C.,  
472 Curtin, G., Arkin, A. P., Deutschbauer, A., and Golden, S. S. 2015 The essential gene set of a  
473 photosynthetic organism. Proc. Natl. Acad. Sci. USA 112:E6634–6643.  
474
- 475 13. Ishii, A., and Hihara, Y. 2008 An AbrB-like transcriptional regulator, Sll0822, is essential  
476 for the activation of nitrogen-regulated genes in *Synechocystis* sp. PCC 6803. Plant Physiol  
477 148:660–670.  
478
- 479 14. Oliveira, P., and Lindblad, P. 2008 An AbrB-like protein regulates the expression of the  
480 bidirectional hydrogenase in *Synechocystis* sp. strain PCC 6803. J. Bacteriol. 190:1011–1019.

481

482 15. Agervald, A., Zhang, X., Stensjö, K., Devine, E., and Lindblad, P. 2010 CalA, a  
483 cyanobacterial AbrB protein, interacts with the upstream region of *hypC* and acts as a repressor  
484 of its transcription in the cyanobacterium *Nostoc* sp. strain PCC 7120. *Appl Environ Microbiol.*  
485 76:880–890.

486

487 16. He, D., and Xu, X. 2010 CalA, a cyAbrB protein, binds to the upstream region of *ftsZ* and is  
488 down-regulated in heterocysts in *Anabaena* sp. PCC 7120. *Arch Microbiol* 192:461–469.

489

490 17. Lieman-Hurwitz, J., Haimovich, M., Shalev-Malul, G., Ishii, A., Hihara, Y., Gaathon, A.,  
491 Lebediker, M., and Kaplan, A. 2009 A cyanobacterial AbrB-like protein affects the apparent  
492 photosynthetic affinity for CO<sub>2</sub> by modulating low-CO<sub>2</sub>-induced gene expression. *Environ*  
493 *Microbiol* 11:927–936.

494

495 18. Kaniya, Y., Kizawa, A., Miyagi, A., Kawai-Yamada, M., Uchimiya, H., Kaneko, Y.,  
496 Nishiyama, Y., and Hihara, Y. 2013 Deletion of the transcriptional regulator *cyAbrB2*  
497 deregulates primary carbon metabolism in *Synechocystis* sp. PCC 6803. *Plant Physiol*  
498 162:1153–1163.

499

500 19. Orf, I., Schwarz, D., Kaplan, A., Kopka, J., Hess, W. R., Hagemann, M., and Klähn, S. 2016  
501 CyAbrB2 contributes to the transcriptional regulation of low CO<sub>2</sub> acclimation in *Synechocystis*  
502 sp. PCC 6803. *Plant Cell Physiol.* 57:2232–2243.

503

504 20. Yamauchi, Y., Kaniya, Y., Kaneko, Y., and Hihara, Y. 2011 Physiological roles of the

505 cyAbrB transcriptional regulator pair SII0822 and SII0359 in *Synechocystis* sp. strain PCC 6803.

506 J. Bacteriol. 193:3702–3709.

507

508 21. Knoot, C. J., Ungerer, J., Wangikar, P. P., and Pakrasi, H. B. 2018 Cyanobacteria:

509 Promising biocatalysts for sustainable chemical production. J. Biol. Chem. 293:5044–5052.

510

511 22. Humphreys, C. M., and Minton, N. P. 2018 Advances in metabolic engineering in the

512 microbial production of fuels and chemicals from C1 gas. Curr Opin Biotechnol 50:174–181.

513

514 23. Carroll, A. L., Case, A. E., Zhang, A., and Atsumi, S. 2018 Metabolic engineering tools in

515 model cyanobacteria. Metab Eng 50:47-56.

516

517 24. Yao, L., Cengic, I., Anfelt, J., and Hudson, E. P. 2016 Multiple gene repression in

518 cyanobacteria using CRISPRi. ACS Synth Biol 5:207–212.

519

520 25. Gordon, G. C., Korosh, T. C., Cameron, J. C., Markley, A. L., Begemann, M. B., and

521 Pflieger, B. F. 2016 CRISPR interference as a titratable, trans-acting regulatory tool for

522 metabolic engineering in the cyanobacterium *Synechococcus* sp. strain PCC 7002. Metab. Eng.

523 38:170–179.

524

525 26. Higo, A., Isu, A., Fukaya, Y., Ehira, S., and Hisabori, T. 2018 Application of CRISPR

526 interference for metabolic engineering of the heterocyst-forming multicellular cyanobacterium

527 *Anabaena* sp. PCC 7120. Plant Cell Physiol. 59:119–127.

528

- 529 27. Naduthodi, M. I. S., Barbosa, M. J., and van der Oost, J. 2018 Progress of CRISPR-Cas  
530 based genome editing in photosynthetic microbes.. *Biotechnol J* 13:e1700591.  
531
- 532 28. Behler, J., Vijay, D., Hess, W. R., and Akhtar, M. K. 2018 CRISPR-based technologies for  
533 metabolic engineering in cyanobacteria. *Trends Biotechnol* 36:996-1010.  
534
- 535 29. Qi, L. S., Larson, M. H., Gilbert, L. A., Doudna, J. A., Weissman, J. S., Arkin, A. P., and  
536 Lim, W. A. 2013 Repurposing CRISPR as an RNA-guided platform for sequence-specific  
537 control of gene expression. *Cell* 152:1173–1183.  
538
- 539 30. Kaczmarzyk, D., Cengic, I., Yao, L., and Hudson, E. P. 2018 Diversion of the long-chain  
540 acyl-ACP pool in *Synechocystis* to fatty alcohols through CRISPRi repression of the essential  
541 phosphate acyltransferase PlsX. *Metab Eng* 45:59–66.  
542
- 543 31. Katayama, M., and Ohmori, M. 1997 Isolation and characterization of multiple adenylate  
544 cyclase genes from the cyanobacterium *Anabaena* sp. strain PCC 7120. *J. Bacteriol.*  
545 179:3588–3593.  
546
- 547 32. Higa, K. C., and Callahan, S. M. 2010 Ectopic expression of *hetP* can partially bypass the  
548 need for *hetR* in heterocyst differentiation by *Anabaena* sp. strain PCC 7120. *Mol. Microbiol.*  
549 77:562–574.  
550
- 551 33. Videaud, P., Rivers, O. S., Hurd, K., Ushijima, B., Oshiro, R. T., Ende, R. J., O’Hanlon, S.  
552 M., and Cozy, L. M. 2016 The heterocyst regulatory protein HetP and its homologs modulate



- 553 heterocyst commitment in *Anabaena* sp. strain PCC 7120. Proc. Natl. Acad. Sci. USA  
554 113:E6984–E6992.
- 555
- 556 34. Du, Y., Cai, Y., Hou, S., and Xu, X. 2012 Identification of the HetR recognition sequence  
557 upstream of *hetZ* in *Anabaena* sp. strain PCC 7120. J. Bacteriol. 194:2297
- 558
- 559 35. Videau, P., Rivers, O. S., Tom, S. K., Oshiro, R. T., Ushijima, B., Swenson, V. A., Philmus,  
560 B., Gaylor, M. O., and Cozy, L. M. 2018 The *hetZ* gene indirectly regulates heterocyst  
561 development at the level of pattern formation in *Anabaena* sp. strain PCC 7120. Mol. Microbiol.  
562 109:91–104.
- 563
- 564 36. Zhang, H., Wang, S., Wang, Y., and Xu, X. 2018 Functional overlap of *hetP* and *hetZ* in  
565 regulation of heterocyst differentiation in *Anabaena* sp. strain PCC 7120. J. Bacteriol.  
566 200:e00707–e00717.
- 567
- 568 37. Holland, D., and Wolk, C. P. 1990 Identification and characterization of *hetA*, a gene that  
569 acts early in the process of morphological differentiation of heterocysts. J. Bacteriol.  
570 172:3131–3137.
- 571
- 572 38. Videau, P., Ni, S., Rivers, O. S., Ushijima, B., Feldmann, E. A., Cozy, L. M., Kennedy, M.  
573 A., and Callahan, S. M. 2014 Expanding the direct HetR regulon in *Anabaena* sp. strain PCC  
574 7120. J. Bacteriol. 196:1113–1121.
- 575
- 576 39. Asai, H., Iwamori, S., Kawai, K., Ehira, S., Ishihara, J., Aihara, K., Shoji, S., and Iwasaki, H.

- 577 2009 Cyanobacterial cell lineage analysis of the spatiotemporal *hetR* expression profile during  
578 heterocyst pattern formation in *Anabaena* sp. PCC 7120.  
579 PLoS One 4:e7371.  
580
- 581 40. Agervald, A., Baebprasert, W., Zhang, X., Incharoensakdi, A., Lindblad, P., and Stensjö, K.  
582 2010 The cyAbrB transcription factor CalA regulates the iron superoxide dismutase in *Nostoc*  
583 sp. strain PCC 7120. Environ Microbiol 12:2826–2837.  
584
- 585 41. Ehira, S., and Ohmori, M. 2006 NrrA, a nitrogen-responsive response regulator facilitates  
586 heterocyst development in the cyanobacterium *Anabaena* sp. strain PCC 7120. Mol. Microbiol.  
587 59:1692–1703.  
588
- 589 42. Black, T., Cai, Y., and Wolk, C. P. 1993 Spatial expression and autoregulation of *hetR*, a  
590 gene involved in the control of heterocyst development in *Anabaena*. Mol. Microbiol. 9:77–84.  
591
- 592 43. Yoon, H. S., and Golden, J. W. 1998 Heterocyst pattern formation controlled by a diffusible  
593 peptide. Science 282:935–938.  
594
- 595 44. Sakr, S., Dutheil, J., Saenkham, P., Bottin, H., and Leplat, C. et al. 2013 The activity of the  
596 *Synechocystis* PCC6803 AbrB2 regulator of hydrogen production can be post-translationally  
597 controlled through glutathionylation. Int. J. Hydrog. Energ 38:13547—13555.  
598
- 599 45. Higo, A., Horinouchi, S., and Ohnishi, Y. 2011 Strict regulation of morphological  
600 differentiation and secondary metabolism by a positive feedback loop between two global

- 601 regulators AdpA and BldA in *Streptomyces griseus*. Mol. Microbiol. 81:1607–1622.
- 602
- 603 46. den Hengst, C. D., Tran, N. T., Bibb, M. J., Chandra, G., Leskiw, B. K., and Buttner, M. J.
- 604 2010 Genes essential for morphological development and antibiotic production in *Streptomyces*
- 605 *coelicolor* are targets of BldD during vegetative growth. Mol. Microbiol. 78:361–379.
- 606
- 607 47. Phillips, Z. E., and Strauch, M. A. 2002 *Bacillus subtilis* sporulation and stationary phase
- 608 gene expression. Cell Mol Life Sci. 2 59:392–402.
- 609
- 610 48. Bush, M. J., Tschowri, N., Schlimpert, S., Flårdh, K., and Buttner, M. J. 2015 c-di-GMP
- 611 signalling and the regulation of developmental transitions in streptomycetes. Nat Rev Microbiol
- 612 13:749-760.
- 613
- 614 49. Borthakur, P. B., Orozco, C. C., Young-Robbins, S. S., Haselkorn, R., and Callahan, S. M.
- 615 2005 Inactivation of *patS* and *hetN* causes lethal levels of heterocyst differentiation in the
- 616 filamentous cyanobacterium *Anabaena* sp. PCC 7120. Mol. Microbiol. 57:111–123.
- 617
- 618 50. Higa, K. C., Rajagopalan, R., Risser, D. D., Rivers, O. S., Tom, S. K., Videau, P., and
- 619 Callahan, S. M. 2012 The RGSGR amino acid motif of the intercellular signaling protein, HetN,
- 620 is required for patterning of heterocysts in *Anabaena* sp. strain PCC 7120. Mol. Microbiol.
- 621 83:682–693.
- 622
- 623 51. Valladares, A., Flores, E., and Herrero, A. 2016 The heterocyst differentiation
- 624 transcriptional regulator HetR of the filamentous cyanobacterium *Anabaena* forms tetramers

625 and can be regulated by phosphorylation. *Mol. Microbiol.* 99:808–819  
626  
627 52. Thomas, J. 1970 Absence of the pigments of photosystem II of photosynthesis in  
628 heterocysts of a blue-green alga. *Nature* 228:181–183.  
629  
630 53. Cardona, T., Battchikova, N., Zhang, P., Stensjö, K., Aro, E. M., Lindblad, P., and  
631 Magnuson, A. 2009 Electron transfer protein complexes in the thylakoid membranes of  
632 heterocysts from the cyanobacterium *Nostoc punctiforme*. *Biochim Biophys Acta*  
633 1787:252–263.  
634  
635 54. Rippka, R., Deruelles, J., Waterbury, J. B., Herdman, M., and Stanier, R. Y. 1979 Generic  
636 assignments, strain histories and properties of pure cultures of cyanobacteria. *J. Gen. Microbiol.*  
637 111:1–61.  
638  
639 55. Fu, C., Donovan, W. P., Shikapwashya-Hasser, O., Ye, X., and Cole, R. H. 2014 Hot fusion:  
640 An efficient method to clone multiple DNA fragments as well as inverted repeats without ligase.  
641 *PLoS ONE* 9:e115318.  
642  
643 56. Cai, Y., and Wolk, C. P. 1990 Use of a conditionally lethal gene in *Anabaena* sp. strain PCC  
644 7120 to select for double recombinants and to entrap insertion sequences. *J. Bacteriol.*  
645

646

Table 1 Primers used in this study

| Primer                          | Sequence (5' - 3')         |
|---------------------------------|----------------------------|
| # <i>cyabrB2</i> knockout       |                            |
| 2080-5F                         | AAGAGCTCGAGCTGGGATATCTTGAC |
| 2080-5R                         | AGTCGCGAGCCACACTGTTTAGCTT  |
| 2080-3F                         | AGTCGCGAACCAGGAGATGAGTTTG  |
| 2080-3R                         | AACTCGAGTAGAGGATGCTATGCTTG |
| #His- <i>cyAbrB1</i> expression |                            |
| 0946-F                          | AACATATGACTGAAACTGCAACC    |
| 0946-R                          | AGGGATCCTTATTCTTCATCTTCCAA |
| #qPCR                           |                            |
| rnpB_RT_F                       | CGTGAGGATAGTGCCACAGA       |
| rnpB_RT_R                       | ATAGTTCCTTCGGCCTTGCT       |
| RT <i>cyabrB1</i> -F            | ACCACGACGAGAAAGAGCTA       |
| RT <i>cyabrB1</i> -R            | TTGGTGCTTCTGGGCTAAGA       |
| R <i>hetR</i> -F                | CATCGATCTGATCAAGCGTCT      |
| R <i>hetR</i> -R                | CAGGGCTTGTCTGACTTCCT       |
| R <i>hetP</i> -F                | TGGTTGAAGCAATTCTGGCT       |
| R <i>hetP</i> -R                | TGTGCGGTAGGGAATGTAGT       |
| hetZ_F_RT                       | AACCACCAGAAACCAACGTC       |
| hetZ_R_RT                       | TCTGGTTCTGGTTGGGTAGC       |
| R <i>ThepA</i> -F               | CAGGAATTAGCTGGGTTGACA      |
| R <i>ThepA</i> -R               | ATTGAAGGTAGCACGCATCC       |
| R <i>TnifH</i> -F               | GCTTTCTACGGTAAAGGCGG       |
| R <i>TnifH</i> -R               | TGGAGTCAGCTTTAGGGTCG       |
| alr0947_RT_F                    | ACGGGAAACTTTACCCCAAC       |
| alr0947_RT_R                    | AGTAGCGATCGCCCAGACTA       |
| #EMSA                           |                            |
| PhetP-F                         | TTCCGGATTTATGGTTGCAAC      |
| PhetP-R                         | TTTGAGCATTCTACTAGG         |

|           |                           |
|-----------|---------------------------|
| PhepA-F   | CAAAATTTAAAATTAAATACAG    |
| PhepA-R   | CTCACAATTTTATAGTTGTGCAGGG |
| Cy3-M13-F | Cy3-TTGTAACGACGGCCAGTG    |

---

647

648 **Figure legends**

649 Figure 1. Promotion of heterocyst formation by knockdown of *cyabrB1* in the presence of  
650 nitrate. Control strain lacking sgRNA (C100) and *cyabrB1* knockdown strain (C104) were  
651 cultured in nitrate-containing medium in the absence or presence of the inducer aTc (50 ng/ml).  
652 Cultures were bubbled with air containing 5% (v/v) CO<sub>2</sub>. (A) Formation of heterocysts by  
653 *cyabrB1* knockdown in the presence of nitrate. Images were photographed after 48 h of  
654 cultivation. Arrowheads indicate heterocysts. (B) Confirmation of cyAbrB1 knockdown. After  
655 48 h of cultivation, total protein was extracted and western blotting using anti-cyAbrB1  
656 antibody was performed. Different amounts of total proteins from C100 cultured in the absence  
657 of aTc were loaded to show the linearity of the results. (C) Time course analysis of cyAbrB1  
658 knockdown. Each strain was cultivated for the indicated time in the presence of 50 ng/ml aTc.  
659 Subsequently, total protein was extracted and western blotting using anti-cyAbrB1 antibody was  
660 performed.

661

662 Figure 2. Up-regulation of some genes related to heterocyst differentiation following  
663 knockdown of *cyabrB1*. After 48 h of cultivation in the absence or presence of 50 ng/ml aTc,  
664 RNA was extracted and RT-qPCR was performed. *rnpB* was used for normalization. Data  
665 represent mean  $\pm$  SD (n = 3 from independent culture). Amounts of each gene relative to that in  
666 C100 grown in nitrate-containing medium bubbled with air containing 5% (v/v) CO<sub>2</sub> in the  
667 absence of the inducer are shown. (A) Each strain was grown in nitrate-containing medium and  
668 bubbled with air containing 5% (v/v) CO<sub>2</sub>. (B) Strain C104 was grown in nitrate-containing  
669 medium bubbled with air containing 1% (v/v) CO<sub>2</sub>, or in ammonium-containing medium  
670 bubbled with air containing 5% (v/v) CO<sub>2</sub>.

671

672 Figure 3. Knockdown of *cyabrB1* in the *hetR* mutant background. Cells were cultured in  
673 nitrate-containing medium bubbled with air containing 5% (v/v) CO<sub>2</sub> in the absence or presence  
674 of aTc for 48 h. (A) Effect of *hetR* inactivation on expression of *cyabrB1* and genes related to  
675 heterocyst formation. RNA was extracted and RT-qPCR was performed. *mnpB* was used for  
676 normalization. Data represent mean  $\pm$  SD (n = 3 from independent culture). Amounts of each  
677 gene relative to that in C100 cultured in nitrate-containing medium bubbled with air containing  
678 5% (v/v) CO<sub>2</sub> in the absence of the inducer are shown. (B) Confirmation of cyAbrB1  
679 knockdown. Total protein was extracted and western blotting using anti-cyAbrB1 antibody was  
680 performed. (C) No heterocyst formation by *cyabrB1* knockdown in *hetR* deletion background.  
681 Cells of C104h were micro-photographed.

682

683 Figure 4. Specific and redundant functions of *cyabrB* genes. Cells were cultured in  
684 nitrate-containing medium bubbled with air containing 1% (v/v) CO<sub>2</sub> in the absence or presence  
685 of aTc for 48 h. (A) Formation of heterocysts by *cyabrB1* knockdown and *cyabrB2* knockout.  
686 Cells of C104B2 or DR2080 were micro-photographed. (B) RNA was extracted and RT-qPCR  
687 was performed. *mnpB* was used for normalization. Data represent the mean  $\pm$  SD (n = 3 from  
688 independent culture). Amounts of each gene relative to that in C100 grown in nitrate-containing  
689 medium bubbled with air containing 5% (v/v) CO<sub>2</sub> in the absence of the inducer are shown.

690

691 Figure 5. Direct binding of cyAbrB1 to promoters of *hetP* and *hepA*. (A) Purification of  
692 His-cyAbrB1. Purified His-cyAbrB1 was subjected to 15% SDS-PAGE. Lane M, protein  
693 molecular weight marker; lane His-cyAbrB1, purified His-cyAbrB1. (B) Electrophoresis  
694 mobility shift assay with His-cyAbrB1. cyAbrB1 was mixed with 3 nM DNA probe (promoter  
695 region of *hetP*). Non-labeled DNAs (PhetP, PhepA, or internal region of *cyabrB1* (*cyabrB1RT*))



696 were added.

697

698 Figure 6. Effect of *cyabrB1* over-expression on heterocyst development. Cells of the negative  
699 control strain C100 and *cyabrB1* over-expression strain T121 were cultured in the absence or  
700 presence of 200 ng/ml aTc. (A) Impaired growth under nitrogen-depleted conditions by *cyabrB1*  
701 over-expression. Cells were cultured in nitrogen-free or nitrate-containing medium and OD<sub>750</sub>  
702 was monitored. Data represent mean  $\pm$  SD (n= 3 from independent culture). (B) Effect of  
703 *cyabrB1* over-expression on heterocyst formation. Cells of C100 and T121 cultured for 24 h in  
704 the absence or presence of the inducer were micro-photographed. (C) Effect of *cyabrB1*  
705 over-expression on expression of genes related to heterocyst formation. After 8 h of nitrogen  
706 depletion, RNA was extracted and RT-qPCR was performed. *mnpB* was used for normalization.  
707 Data represent mean  $\pm$  SD (n = 3 from independent culture). Amounts of each gene relative to  
708 that in C100 grown in nitrate-free medium in the absence of the inducer are shown.  
709 Over-expression of cyAbrB1 was confirmed by western blotting.

710

711

712 Figure S1. Schematic representation of the genetic backgrounds of strains used in the present  
713 study. Components related to CRISPRi system or induction of *cyabrB1* were integrated at  
714 neutral site *cyaA* locus by single homologous recombination. Note that sizes of genes in the map  
715 are not proportional to sequence lengths.

716

717 Figure S2. Knockdown of *cyabrB1* leads to formation of heterocysts in the presence of nitrate,  
718 but not in the presence of ammonium. Cells were cultured for 48 h in the absence or presence of  
719 aTc and micro-photographed. Arrowheads indicate heterocysts. (A) *cyabrB1* knockdown strain

720 (C104) was cultured in nitrate-containing medium and bubbled with air containing 1% (v/v)  
721 CO<sub>2</sub>. (B) *cyabrB1* knockdown strain (C104) was cultured in ammonium-containing medium  
722 bubbled with air containing 5% (v/v) CO<sub>2</sub>.  
723  
724 Figure S3. Knockdown of *cyabrB1* using sgRNA targeting different sites of *cyabrB1* led to  
725 formation of heterocysts in the presence of nitrate. Cells were cultured for 48 h in the absence or  
726 presence of aTc and micro-photographed. Arrowheads indicate heterocysts. Each *cyabrB1*  
727 knockdown strain was cultured in nitrate-containing medium bubbled with air containing 5%  
728 (v/v) CO<sub>2</sub>.  
729  
730 Figure S4. Confirmation of *cyabrB1* knockdown. (A and C) After 48 h of cultivation in the  
731 absence or presence of 50 ng/ml aTc, RNA was extracted and RT-qPCR was performed. *mpB*  
732 was used for normalization. Data represent mean ± SD (n = 3 from independent culture).  
733 Amounts of each gene relative to that in C100 grown in nitrate-containing medium bubbled  
734 with air containing 5% (v/v) CO<sub>2</sub> in the absence of the inducer are shown. (B and D) After 48 h  
735 of cultivation in the absence or presence of 50 ng/ml aTc, total protein was extracted and  
736 western blotting using anti-cyAbrB1 antibody was performed. (A and B) Each strain was grown  
737 in nitrate-containing medium and bubbled with air containing 5% (v/v) CO<sub>2</sub>. (C and D) Strain  
738 C104 was cultured in nitrate-containing medium bubbled with air containing 5 or 1% (v/v) CO<sub>2</sub>  
739 or in ammonium-containing medium bubbled with air containing 5% (v/v) CO<sub>2</sub>.  
740  
741 Figure S5. Expression of *nifH* encoding nitrogenase subunit in *cyabrB1* knockdown strain C104  
742 under different conditions. After 48 h of cultivation under the indicated conditions in the  
743 absence or presence of 50 ng/ml aTc, RNA was extracted and RT-qPCR was performed. *mpB*

744 was used for normalization. Data represent mean  $\pm$  SD (n = 3 from independent culture).

745 Amounts of *nifH* relative to that in C100 grown in nitrate-containing medium bubbled with air

746 containing 5% (v/v) CO<sub>2</sub> in the absence of the inducer are shown.

747

748 Figure S6. Knockdown of *cyabrB1* in *cyabrB2* deletion background. Cells were cultured in

749 nitrogen-containing media bubbled with air containing 1% (v/v) CO<sub>2</sub> in the absence or presence

750 of aTc for 48 h. (A) Confirmation of *cyabrB1* knockdown. Cells were cultured in the presence

751 of nitrate. RNA was extracted and RT-qPCR was performed. *rnpB* was used for normalization.

752 Data represent mean  $\pm$  SD (n = 3 from independent culture). Amounts of *cyabrB1* relative to

753 that in C100 grown in nitrate-containing medium bubbled with air containing 5% (v/v) CO<sub>2</sub> in

754 the absence of the inducer are shown. (B) Confirmation of cyAbrB1 knockdown. Each strain

755 was grown in the presence of nitrate or ammonium-containing medium. Total protein was

756 extracted and western blotting using anti-cyAbrB1 antibody was performed. (C) No heterocyst

757 formation of 104B2 following *cyabrB1* knockdown in ammonium-medium. Cells of C104B2

758 were cultured in the presence of ammonium and were micro-photographed.

759

760 Figure S7. Heterocyst formation in *cyabrB1* knockdown strain C104 in the absence of combined

761 nitrogen sources. Nitrate was depleted from the culture medium in strain C104. Subsequently,

762 C104 was cultured in nitrogen-free medium in the absence or presence of 50 ng/ml aTc. Images

763 were photographed after 24 (A) or 48 h (B) of cultivation. Arrowheads indicate heterocysts. (C)

764 Lengths of vegetative cell intervals between heterocysts in C104 cultured in nitrogen-free

765 medium for 48 h in the absence (gray bars) or presence of aTc (black bars). (D) Confirmation of

766 cyAbrB1 knockdown under nitrogen-fixation conditions. After 48 h of cultivation in

767 nitrogen-free medium in the absence or presence of 50 ng/ml aTc, total protein was extracted

768 and western blotting using anti-cyAbrB1 antibody was performed.

769

770 Figure S8. Expression of cyAbrB1 in wild type background. (A and B) Expression of cyAbrB1

771 after nitrogen depletion. Cells of PCC 7120 cultured in nitrate medium were washed two times

772 with nitrogen-free medium. Subsequently, cells were resuspended in nitrate-medium (+N) or

773 nitrogen-free medium (-N) and were cultured for 8 h. (A) Total protein was extracted and

774 western blotting using anti-cyAbrB1 was performed. (B) Relative amounts of cyAbrB1

775 compared to that before nitrogen depletion were quantified from western blots. Data represent

776 mean  $\pm$  SD (n = 3 from independent culture). (C and D) Expression of cyAbrB1 in heterocysts.

777 (C) After 24 h of nitrogen depletion, heterocysts were enriched. Total protein was extracted

778 from whole filaments (lane W) and enriched heterocysts (lane H). Western blotting using

779 anti-cyAbrB1, anti-RbcL, and anti-NifH antibodies was performed. RbcL and NifH are marker

780 proteins for vegetative cells and heterocysts, respectively. (D) Relative amounts of cyAbrB1 in

781 heterocysts compared to that in whole filaments were quantified from western blots. Data

782 represent mean  $\pm$  SD (n = 3 from independent culture).

783

784 Figure S9. Effect of *cyabrB1* knockdown or over-expression on expression of *alr0947*. RNA

785 was extracted and RT-qPCR was performed. *rnpB* was used for normalization. Data represent

786 mean  $\pm$  SD (n = 3 from independent culture). (A and B) Cells were grown in the absence or

787 presence of aTc for 48 h. (A) Each strain was grown in nitrate-containing medium bubbled with

788 air containing 5% (v/v) CO<sub>2</sub>. (B) C104 was grown under indicated conditions. Amounts of

789 *alr0947* relative to that in C100 cultured in nitrate-containing medium bubbled with air

790 containing 5% (v/v) CO<sub>2</sub> in the absence of the inducer are shown. (C) Each strain was grown in

791 nitrogen-free medium for 8 h. Data represent mean  $\pm$  SD (n = 3 from independent culture).

792 Amounts of *alr0947* relative to that in C100 cultured in nitrate-free medium in the absence of  
793 the inducer are shown.

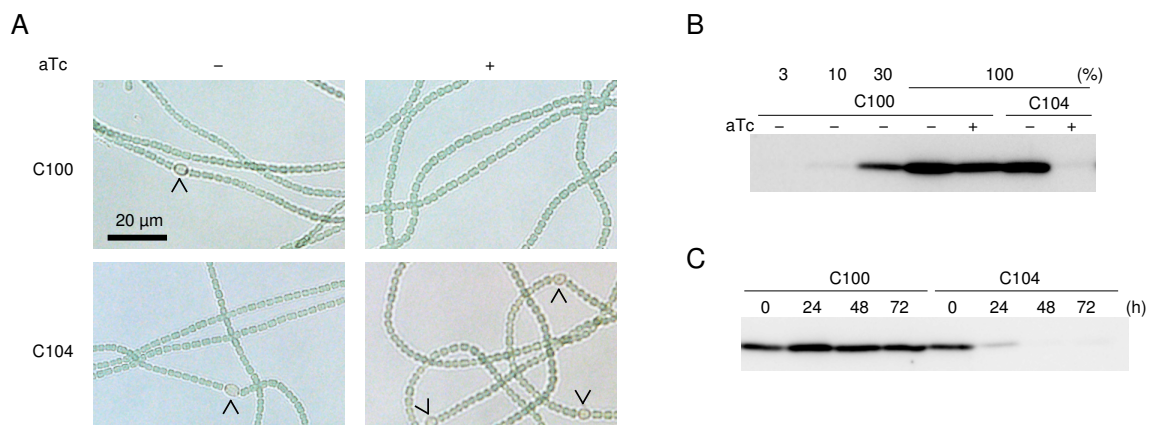

Fig. 1. Promotion of heterocyst formation by knockdown of *cyabrB1* in the presence of nitrate. Control strain lacking sgRNA (C100) and *cyabrB1* knockdown strain (C104) were cultured in nitrate-containing medium in the absence or presence of the inducer aTc (50 ng/ml). Cultures were bubbled with air containing 5% (v/v) CO<sub>2</sub>. (A) Formation of heterocysts by *cyabrB1* knockdown in the presence of nitrate. Images were photographed after 48 h of cultivation. Arrowheads indicate heterocysts. (B) Confirmation of cyAbrB1 knockdown. After 48 h of cultivation, total protein was extracted and western blotting using anti-cyAbrB1 antibody was performed. Different amounts of total proteins from C100 cultured in the absence of aTc were loaded to show the linearity of the results. (C) Time course analysis of cyAbrB1 knockdown. Each strain was cultivated for the indicated time in the presence of 50 ng/ml aTc. Subsequently, total protein was extracted and western blotting using anti-cyAbrB1 antibody was performed.

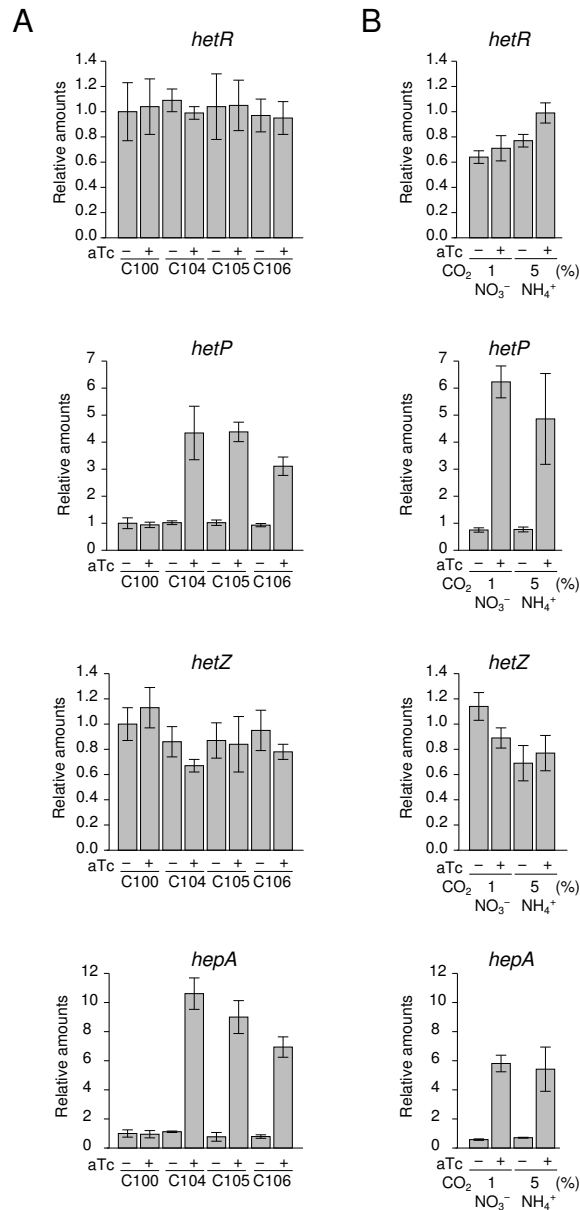

Fig. 2. Up-regulation of some genes related to heterocyst differentiation following knockdown of *cyabrB1*. After 48 h of cultivation in the absence or presence of 50 ng/ml aTc, RNA was extracted and RT-qPCR was performed. *rnpB* was used for normalization. Data represent mean  $\pm$  SD ( $n = 3$  from independent culture). Amounts of each gene relative to that in C100 grown in nitrate-containing medium bubbled with air containing 5% (v/v) CO<sub>2</sub> in the absence of the inducer are shown. (A) Each strain was grown in nitrate-containing medium and bubbled with air containing 5% (v/v) CO<sub>2</sub>. (B) Strain C104 was grown in nitrate-containing medium bubbled with air containing 1% (v/v) CO<sub>2</sub>, or in ammonium-containing medium bubbled with air containing 5% (v/v) CO<sub>2</sub>.

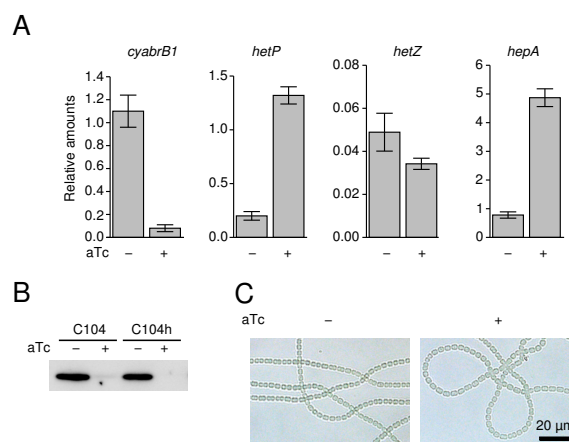

Fig. 3. Knockdown of *cyabrB1* in the *hetR* mutant background. Cells were cultured in nitrate-containing medium bubbled with air containing 5% (v/v) CO<sub>2</sub> in the absence or presence of aTc for 48 h. (A) Effect of *hetR* inactivation on expression of *cyabrB1* and genes related to heterocyst formation. RNA was extracted and RT-qPCR was performed. *rnpB* was used for normalization. Data represent mean  $\pm$  SD (n = 3 from independent culture). Amounts of each gene relative to that in C100 cultured in nitrate-containing medium bubbled with air containing 5% (v/v) CO<sub>2</sub> in the absence of the inducer are shown. (B) Confirmation of cyAbrB1 knockdown. Total protein was extracted and western blotting using anti-cyAbrB1 antibody was performed. (C) No heterocyst formation by *cyabrB1* knockdown in *hetR* deletion background. Cells of C104h were micro-photographed.



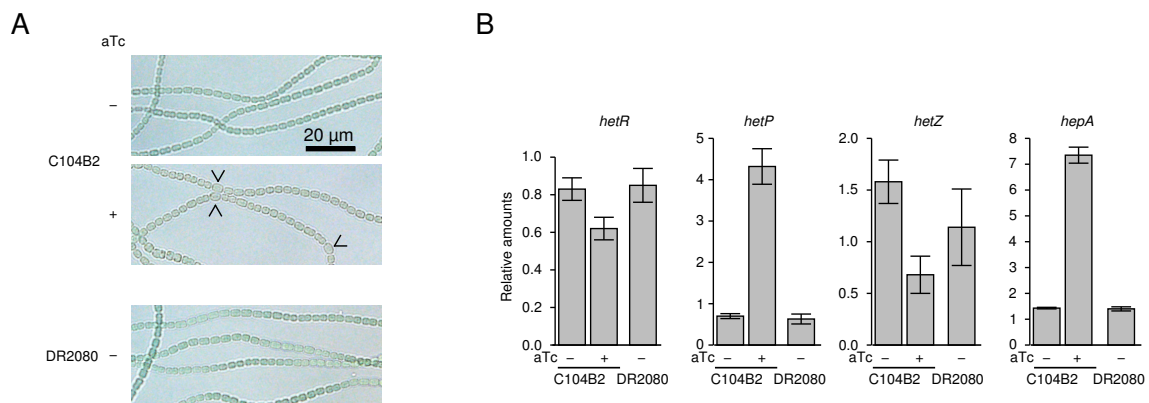

Fig. 4. Specific and redundant functions of *cyabrB* genes. Cells were cultured in nitrate-containing medium bubbled with air containing 1% (v/v) CO<sub>2</sub> in the absence or presence of aTc for 48 h. (A) Formation of heterocysts by *cyabrB1* knockdown and *cyabrB2* knock-out. Cells of C104B2 or DR2080 were micro-photographed. (B) RNA was extracted and RT-qPCR was performed. *rnpB* was used for normalization. Data represent the mean  $\pm$  SD ( $n = 3$  from independent culture). Amounts of each gene relative to that in C100 grown in nitrate-containing medium bubbled with air containing 5% (v/v) CO<sub>2</sub> in the absence of the inducer are shown.

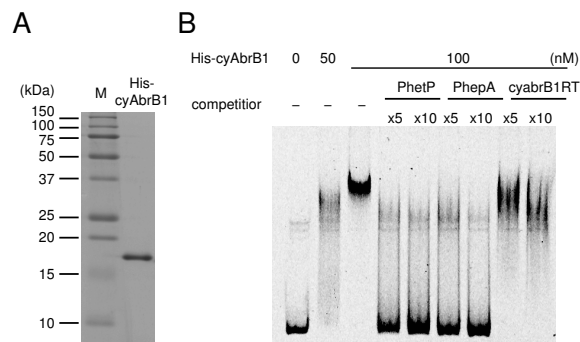

Fig. 5. Direct binding of cyAbrB1 to promoters of *hetP* and *hepA*. (A) Purification of His-cyAbrB1. Purified His-cyAbrB1 was subjected to 15% SDS-PAGE. Lane M, protein molecular weight marker; lane His-cyAbrB1, purified His-cyAbrB1. (B) Electrophoresis mobility shift assay with His-cyAbrB1. cyAbrB1 was mixed with 3 nM DNA probe (promoter region of *hetP*). Non-labeled DNAs (PhetP, PhepA, or internal region of *cyabrB1* (*cyabrB1*RT)) were added.

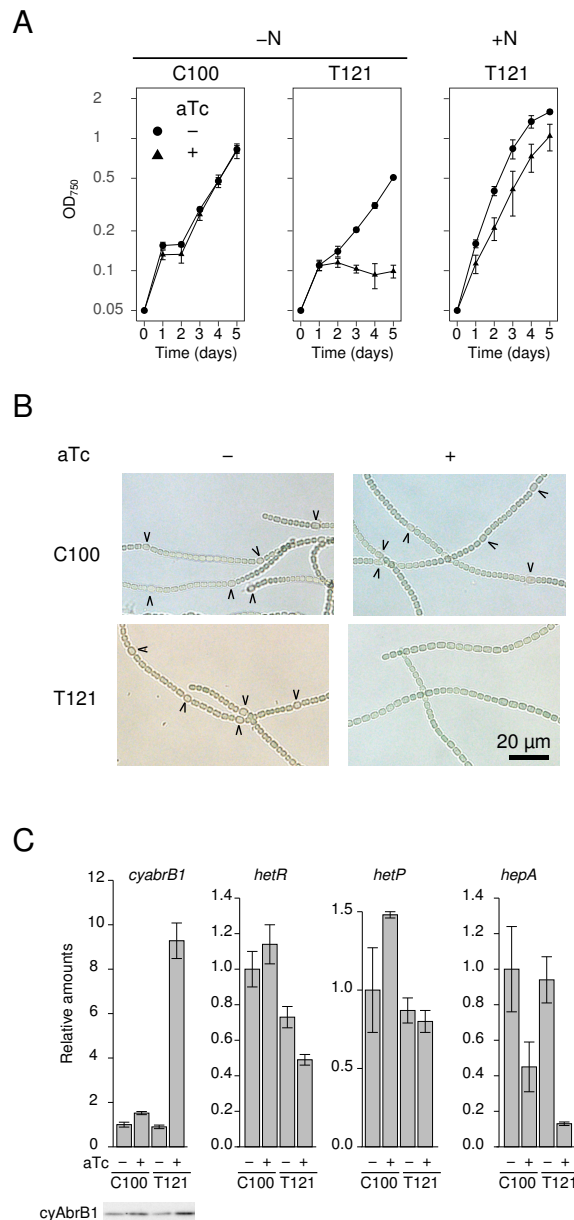

Fig. 6. Effect of *cyabrB1* over-expression on heterocyst development. Cells of the negative control strain C100 and *cyabrB1* over-expression strain T121 were cultured in the absence or presence of 200 ng/ml aTc. (A) Impaired growth under nitrogen-depleted conditions by *cyabrB1* over-expression. Cells were cultured in nitrogen-free or nitrate-containing medium and OD<sub>750</sub> was monitored. Data represent mean  $\pm$  SD (n= 3 from independent culture). (B) Effect of *cyabrB1* over-expression on heterocyst formation. Cells of C100 and T121 cultured for 24 h in the absence or presence of the inducer were micro-photographed. (C) Effect of *cyabrB1* over-expression on expression of genes related to heterocyst formation. After 8 h of nitrogen depletion, RNA was extracted and RT-qPCR was performed. *rnpB* was used for normalization. Data represent mean  $\pm$  SD (n = 3 from independent culture). Amounts of each gene relative to that in C100 grown in nitrate-free medium in the absence of the inducer are shown. Over-expression of cyAbrB1 was confirmed by western blotting.
